# Supplementary material for: FOXM1 promotes reprogramming of glucose metabolism in epithelial ovarian cancer cells via activation of GLUT1 and HK2 transcription
Source: PubMed Central journal article supplement (PMC5216994; doi:10.18632/oncotarget.10103), 2016-06-16
Supplement: oncotarget-07-47985-s001.pdf [file oncotarget-07-47985-s001.pdf]

## FOXMI promotes reprogramming of glucose metabolism in epithelial ovarian cancer cells via activation of GLUT1 and HK2 transcription

### SUPPLEMENTARY TABLES

Supplementary Table S1: Quantitative real-time PCR primers used to amplify metabolic enzyme mRNAs

| Gene    | Primer sequence                  |
|---------|----------------------------------|
| AldoB   |                                  |
| Forward | 5'-ATGCCACTCTCAACCTCAATGCTATC-3' |
| Reverse | 5'-TTATTTTCTTGGGTGGGTATTCTGG-3'  |
| Enolase |                                  |
| Forward | 5'-CTGATGCTGGAGTTGGATGG-3'       |
| Reverse | 5'-CCATTGATCACGTTGAAGGC-3'       |
| FOXMI   |                                  |
| Forward | 5'-CACCCCAGTGCCAACCGCTACTTG-3'   |
| Reverse | 5'-AAAGAGGAGCTATCCCCTCCTCAG-3'   |
| GLUT1   |                                  |
| Forward | 5'-CTTTGTGGCCTTCTTTGAAGT-3'      |
| Reverse | 5'-CCACACAGTTGCTCCACAT-3'        |
| GLUT4   |                                  |
| Forward | 5'-CTTCATCATTGGCATGGGTTT-3'      |
| Reverse | 5'-CGGGTTTCAGGCACTTTTAGG-3'      |
| GAPDH   |                                  |
| Forward | 5'-CAGCCTCAAGATCATCAGCA-3'       |
| Reverse | 5'-TGTGGTCATGAGTCCTTCCA-3'       |
| G6PI    |                                  |
| Forward | 5'-AGGCTG CTGCCACATAAGGT-3'      |
| Reverse | 5'-AGCGTCGTGAGAGGTCACCTTG-3'     |
| HK2     |                                  |
| Forward | 5'-GATTTACCAAGCGTGGACT-3'        |
| Reverse | 5'-CCACACCCACTGTCACCTTTG-3'      |
| LDHA    |                                  |
| Forward | 5'-CAGCTTGGAGTTTGCAGTTAC-3'      |
| Reverse | 5'-TGATGGATCTCCAACATGG-3'        |
| LDHB    |                                  |
| Forward | 5'-CCTAGAGCTCACTAGTCACAG-3'      |
| Reverse | 5'-CTCCTGTGCAAAATGGCAAC-3'       |

(Continued)

| Gene    | Primer sequence              |
|---------|------------------------------|
| PFK-L   |                              |
| Forward | 5'-GGACAGGAAAGAGGAAGTGAC-3'  |
| Reverse | 5'-CGTAGATGAGGAAGACTTTGGC-3' |
| PFK-M   |                              |
| Forward | 5'-ATTCGGGCTGTGTTCTGG-3'     |
| Reverse | 5'-TGGCTAGGATTTGAGGATGG-3'   |
| PFK-P   |                              |
| Forward | 5'-CATCGACAATGATTTCTGCGG-3'  |
| Reverse | 5'-CCATCACCTCCAGAACGAAG-3'   |
| PGK-1   |                              |
| Forward | 5'-CGGTAGTCCTTATGAGCC-3'     |
| Reverse | 5'-CATGAAAGCGGAGGTTCT-3'     |
| PKM1    |                              |
| Forward | 5'-CTATCCTCTGGAGGCTGTGC-3'   |
| Reverse | 5'-CCATGAGGTCTGTGGAGTGA-3'   |
| PKM2    |                              |
| Forward | 5'-GGGTTCCGAGGTTTGATG-3'     |
| Reverse | 5'-ACGGCCGGTGGCTTCTGT-3'     |

Supplementary Table S2: Genes and primer sequences for ChIP assay

| Gene    | Primer sequence               |
|---------|-------------------------------|
| GLUT1   |                               |
| Forward | 5'-TCCCAGAGGAGGTGATTT-3'      |
| Reverse | 5'-CTCGTAGGGTTGTAGAAAGAC-3'   |
| HK2     |                               |
| Forward | 5'-TTGGGTGAGAAAGAGTTTGTATT-3' |
| Reverse | 5'-TCTTTTTCTTTCCCAGTTGTCTC-3' |
| Forward | 5'-AGGGTGAGTGGCAAGAAGGAATC-3' |
| Reverse | 5'-CTCACCATAGTAAATCTACAGCG-3' |
| Forward | 5'-CTCGCTGTAGATTTACTATGGTG-3' |
| Reverse | 5'-CATCTGGACACACCTTCCTCTCT-3' |
